# Supplementary material
Source: PubMed Central journal article supplement (PMC8571983)
Supplement: 146_2021_1290_MOESM1_ESM.pdf [file 146_2021_1290_MOESM1_ESM.pdf]

## Model's weight comparison to attribute plausibility

**Table SW1:** Weight comparison among model with Attitude as outcome variable

|          | <b>Pseudo-BMA without Bayesian bootstrap</b> | <b>Pseudo-BMA with Bayesian bootstrap</b> | <b>Bayesian stacking</b> |
|----------|----------------------------------------------|-------------------------------------------|--------------------------|
| Model 1  | 0.000                                        | 0.005                                     | 0.056                    |
| Model 2  | 0.000                                        | 0.001                                     | 0.112                    |
| Model 3  | 0.000                                        | 0.000                                     | 0.000                    |
| Model 4  | 0.000                                        | 0.001                                     | 0.000                    |
| Model 9  | 0.001                                        | 0.068                                     | 0.000                    |
| Model 10 | 0.999                                        | 0.924                                     | 0.833                    |

**Table SW2:** Weight comparison among model with Familiarity as outcome variable

|         | <b>Pseudo-BMA without Bayesian bootstrap</b> | <b>Pseudo-BMA with Bayesian bootstrap</b> | <b>Bayesian stacking</b> |
|---------|----------------------------------------------|-------------------------------------------|--------------------------|
| Model 5 | 0.821                                        | 0.672                                     | 0.685                    |
| Model 6 | 0.000                                        | 0.030                                     | 0.083                    |
| Model 7 | 0.000                                        | 0.016                                     | 0.057                    |
| Model 8 | 0.179                                        | 0.282                                     | 0.175                    |

## Model 2

Equation:

$$\textit{Attitude} \sim \textit{Christianity} + \textit{Islam} + \textit{Buddhism}$$

Where

- *Attitude* is attitude towards emotional AI (continuous variable);
- *Christianity* is whether the respondent's religion is Christianity (binary variable);
- *Islam* is whether the respondent's religion is Islam (binary variable);
- *Buddhism* is whether the respondent's religion is Buddhism (binary variable);



**Figure S2.0.** Visualization of model 2

**Table S2.1:** Posterior estimate of model 2

|                         | Mean  | SD   | n_eff | Rhat |
|-------------------------|-------|------|-------|------|
| a_Attitude              | 2.86  | 0.04 | 6837  | 1    |
| b_Christianity_Attitude | -0.17 | 0.08 | 9363  | 1    |
| b_Buddhism_Attitude     | -0.13 | 0.07 | 7737  | 1    |
| b_Islam_Attitude        | -0.34 | 0.08 | 9413  | 1    |

Monte Carlo SE of  $\textit{elpd\_loo}$  is 0.0.  
All Pareto  $k$  estimates are good ( $k < 0.5$ ).

## Posterior Diagnostics

### Trace plot diagnostic



Figure S2.1: Trace plot diagnostic for model 2.

### Gelman diagnostic



Figure S2.2: Gelman diagnostic for model 2

ACF diagnostic



Figure S2.3: ACF diagnostic for model 2

Posterior results  
Interval distribution



Figure S2.4: Model 2's posterior interval distribution

Density distribution



Figure S2.5: Density distribution for model 2

## Density distribution with HPDI



**Figure S2.6:** Density distribution with HDPI for model 2

## Model Fit Diagnostic

### Loo test

Computed from 12000 by 775 log-likelihood matrix

|                       | Estimate | SE   |
|-----------------------|----------|------|
| <code>elpd_loo</code> | -897.7   | 19.0 |
| <code>p_loo</code>    | 4.9      | 0.3  |
| <code>looic</code>    | 1795.4   | 38.0 |

-----  
Monte Carlo SE of `elpd_loo` is 0.0.

All Pareto k estimates are good ( $k < 0.5$ ).  
See `help('pareto-k-diagnostic')` for details.



**Figure S2.7:** PSIS diagnostic plot for model 2

Marginal predictive distribution



**Figure S2.8:** Marginal predictive distribution for model 2

WAIC test

Computed from 12000 by 775 log-likelihood matrix

|           | Estimate | SE   |
|-----------|----------|------|
| elpd_waic | -897.7   | 19.0 |
| p_waic    | 4.9      | 0.3  |
| waic      | 1795.4   | 38.0 |



### Model 3

Equation:

$$Attitude \sim Christianity + Islam + Buddhism + Christianity\_Religiosity + Islam\_Religiosity + Buddhism\_Religiosity$$

Where

- *Attitude* is attitude towards emotional AI (continuous variable);
- *Christianity* is whether the respondent's religion is Christianity (binary variable);
- *Islam* is whether the respondent's religion is Islam (binary variable);
- *Buddhism* is whether the respondent's religion is Buddhism (binary variable);
- *Religiosity* is the level of respondent's religiosity (ordinal/continuous variable);
- *Buddhism\_Religiosity* is interaction between *Buddhism* and *Religiosity* so that  $Buddhism\_Religiosity = Buddhism * Religiosity$  (continuous variable);
- *Christianity\_Religiosity* is interaction between *Christianity* and *Religiosity* so that  $Christianity\_Religiosity = Christianity * Religiosity$  (continuous variable);
- *Islam\_Religiosity* is interaction between *Islam* and *Religiosity* so that  $Islam\_Religiosity = Islam * Religiosity$  (continuous variable).



Figure S3.0. Visualization of model

**Table S3.1:** Posterior estimate of model 3

|                                     | Mean  | SD   | n_eff | Rhat |
|-------------------------------------|-------|------|-------|------|
| a_Attitude                          | 2.85  | 0.04 | 8625  | 1    |
| b_Christianity_Attitude             | -0.13 | 0.09 | 9681  | 1    |
| b_Christianity_Religiosity_Attitude | -0.08 | 0.17 | 15126 | 1    |
| b_Buddhism_Attitude                 | -0.10 | 0.07 | 9751  | 1    |
| b_Buddhism_Religiosity_Attitude     | -0.26 | 0.20 | 17805 | 1    |
| b_Islam_Attitude                    | -0.30 | 0.10 | 10034 | 1    |
| b_Islam_Religiosity_Attitude        | -0.09 | 0.17 | 13051 | 1    |

Monte Carlo SE of elpd\_loo is 0.0.  
 All Pareto k estimates are good ( $k < 0.5$ ).

## Posterior Diagnostics

### Trace plot diagnostic



**Figure S3.1:** Trace plot diagnostic for model 3.

# Gelman diagnostic



Figure S3.2: Gelman diagnostic for model 3

## ACF diagnostic



**Figure S3.3:** ACF diagnostic for model 3

Posterior results  
Interval distribution



**Figure S3.4:** Model 3's posterior interval distribution for religious variables.



**Figure S3.5:** Model 3's posterior interval distribution for the interaction between the Buddhism and Religiosity variables.



**Figure S3.6:** Model 3's posterior interval distribution for the interaction between the Islam and Religiosity variables.



**Figure S3.7:** Model 3's posterior interval distribution for the interaction between the Christianity and Religiosity variables.

Density distribution



Figure S3.8: Model 3's posterior density distribution chart for the Religion variable.



Figure S3.9: Model 3's posterior density distribution chart the interaction between the Buddhism and Religiosity variables.





**Figure S3.10:** Model 3's posterior density distribution chart for the interaction between the Islam and Religiosity variables.



**Figure S3.11:** Model 3's posterior density distribution chart for the interaction between the Christianity and Religiosity variables.

## Density distribution with HPDI



**Figure S3.12:** Model 3's density distribution with HDPI for the interaction between the Christianity and Religiosity variables.

## Model Fit Diagnostic

### Loo test

computed from 12000 by 748 log-likelihood matrix

```
Estimate SE
elpd_loo -872.0 18.8
p_loo 7.9 0.6
looic 1744.0 37.5
```

-----  
Monte carlo SE of elpd\_loo is 0.0.

All Pareto k estimates are good (k < 0.5).  
see help('pareto-k-diagnostic') for details.



**Figure S3.13:** PSIS diagnostic plot for model 3

Marginal predictive distribution



Figure S3.14: Marginal predictive distribution for model 3.

WAIC test

Computed from 12000 by 748 log-likelihood matrix

|           | Estimate | SE   |
|-----------|----------|------|
| elpd_waic | -872.0   | 18.8 |
| p_waic    | 7.9      | 0.6  |
| waic      | 1743.9   | 37.5 |

## Model 4

Equation:

$$\text{Attitude} \sim \text{Income} + \text{SchoolYear} + \text{Sex} + \text{Major} + \text{Christianity} + \text{Islam} + \text{Buddhism} \\ + \text{Christianity\_Religiosity} + \text{Islam\_Religiosity} + \text{Buddhism\_Religiosity}$$

Where

- *Attitude* is attitude towards emotional AI (continuous variable);
- *Christianity* is whether the respondent's religion is Christianity (binary variable);
- *Islam* is whether the respondent's religion is Islam (binary variable);
- *Buddhism* is whether the respondent's religion is Buddhism (binary variable);
- *Religiosity* is the level of respondent's religiosity (ordinal/continuous variable);
- *Buddhism\_Religiosity* is interaction between *Buddhism* and *Religiosity* so that  $\text{Buddhism\_Religiosity} = \text{Buddhism} * \text{Religiosity}$  (continuous variable);
- *Christianity\_Religiosity* is interaction between *Christianity* and *Religiosity* so that  $\text{Christianity\_Religiosity} = \text{Christianity} * \text{Religiosity}$  (continuous variable);
- *Islam\_Religiosity* is interaction between *Islam* and *Religiosity* so that  $\text{Islam\_Religiosity} = \text{Islam} * \text{Religiosity}$  (continuous variable).



Figure S4.0: Visualization of model 4.

**Table S4.1:** Posterior estimate of model 4

|                                     | Mean  | SD   | n_eff | Rhat |
|-------------------------------------|-------|------|-------|------|
| a_Attitude                          | 2.10  | 0.17 | 7985  | 1    |
| b_Christianity_Attitude             | -0.15 | 0.09 | 11512 | 1    |
| b_Christianity_Religiosity_Attitude | -0.03 | 0.17 | 13225 | 1    |
| b_Buddhism_Attitude                 | -0.09 | 0.07 | 12126 | 1    |
| b_Buddhism_Religiosity_Attitude     | -0.25 | 0.19 | 15952 | 1    |
| b_Islam_Attitude                    | -0.27 | 0.10 | 10155 | 1    |
| b_Islam_Religiosity_Attitude        | -0.14 | 0.17 | 12374 | 1    |
| b_Income_Attitude                   | 0.16  | 0.06 | 9652  | 1    |
| b_SchoolYear_Attitude               | 0.05  | 0.03 | 12855 | 1    |
| b_Sex_Attitude                      | 0.15  | 0.06 | 13012 | 1    |
| b_Major_Attitude                    | 0.15  | 0.06 | 15121 | 1    |

Monte Carlo SE of elpd\_loo is 0.0.  
 All Pareto k estimates are good ( $k < 0.5$ ).

Posterior Diagnostics

Trace plot diagnostic



**Figure S4.1:** Trace plot diagnostic for model 4.

## Gelman diagnostic



Figure S4.2: Gelman diagnostic for model 4

## ACF diagnostic



Figure S4.3: ACF diagnostic for model 4.



Posterior results  
Interval distribution



Figure S4.4: Model 4's posterior interval distribution for all explanatory variables.



**Figure S4.5:** Model 4's posterior interval distribution for religious variables.



**Figure S4.6:** Model 4's posterior interval distribution for the interaction between the Buddhism and Religiosity variables.



**Figure S4.7:** Model 4's posterior interval distribution for the interaction between the Islam and Religiosity variables.



**Figure S4.8:** Model 4's posterior interval distribution for the interaction between the Christianity and Religiosity variables.

Density distribution



Figure S4.9: Model 4's density distribution for the all the explanatory variables.



Figure S4.10: Model 4's posterior density distribution for the all the Religion variable.



**Figure S4.11:** Model 4's posterior density distribution chart the interaction between the Buddhism and Religiosity variables.



**Figure S4.12:** Model 4's posterior density distribution chart the interaction between the Islam and Religiosity variables.



**Figure S4.13:** Model 4's posterior density distribution chart the interaction between the Christianity and Religiosity variables.

## Density distribution with HPDI



**Figure S4.14:** Model 4's density distribution with HDPI for all the explanatory variables.

## Model Fit Diagnostic

Loo test

Computed from 12000 by 748 log-likelihood matrix

|          | Estimate | SE   |
|----------|----------|------|
| elpd_loo | -862.6   | 18.9 |
| p_loo    | 11.9     | 0.8  |
| looic    | 1725.3   | 37.7 |

-----  
Monte Carlo SE of elpd\_loo is 0.0.

All Pareto k estimates are good ( $k < 0.5$ ).  
see help('pareto-k-diagnostic') for details.



**Figure S4.15:** PSIS diagnostic plot for model 4.

Marginal predictive distribution



**Figure S4.16:** Marginal predictive distribution for model 4.



WAIC test

Computed from 12000 by 748 log-likelihood matrix

|           | Estimate | SE   |
|-----------|----------|------|
| elpd_waic | -862.6   | 18.9 |
| p_waic    | 11.9     | 0.8  |
| waic      | 1725.3   | 37.7 |

## Model 5

Equation:

$$\text{Familiarity} \sim \text{Income} + \text{SchoolYear} + \text{Sex} + \text{Major}$$

Where

Where *Familiarity* is the self-perceived familiarity with AI (continuous variable), *Income* is self-perceived family income (ordinal/continuous variable), *SchoolYear* is the school year of the respondent (ordinal/continuous variable), *Sex* is the biological sex of the respondent (binary variable), and *Major* is the major curriculum of the respondent (binary variable). Priors of all parameters' distribution are set as default which is 'uninformative'.



**Figure S5.0:** Visualization of model 5

**Table S5.1:** Posterior estimate of model 5

|                          | Mean | SD   | n_eff | Rhat |
|--------------------------|------|------|-------|------|
| a_Familiarity            | 1.93 | 0.17 | 7852  | 1    |
| b_Income_Familiarity     | 0.03 | 0.06 | 7156  | 1    |
| b_SchoolYear_Familiarity | 0.01 | 0.03 | 10521 | 1    |
| b_Sex_Familiarity        | 0.25 | 0.06 | 10925 | 1    |
| b_Major_Familiarity      | 0.10 | 0.06 | 12852 | 1    |

Monte Carlo SE of elpd\_loo is 0.0.  
All Pareto k estimates are good (k < 0.5).

Posterior Diagnostics

Trace plot diagnostic



Figure S5.1: Trace plot diagnostic for model 5.

# Gelman diagnostic



Figure S5.2: Gelman diagnostic for model 5

ACF diagnostic



Figure S5.3: ACF diagnostic for model 5.

Posterior results  
Interval distribution



**Figure S5.4:** Model 5's posterior interval distribution for all explanatory variables.

Density distribution



Figure S5.5: Model 5’s posterior density distribution for all explanatory variables.

## Density distribution with HPDI



**Figure S5.5:** Model 4's density distribution with HDPI for all the explanatory variables.

## Model Fit Diagnostic

### Loo test

Computed from 12000 by 748 log-likelihood matrix

```
      Estimate  SE
elpd_loo  -866.1 18.5
p_loo      5.7  0.3
looic      1732.2 37.0
```

-----  
Monte carlo SE of elpd\_loo is 0.0.

All Pareto k estimates are good ( $k < 0.5$ ).  
see help('pareto-k-diagnostic') for details.





**Figure S5.6:** PSIS diagnostic plot for model 5.

Marginal predictive distribution



**Figure S5.7:** Marginal predictive distribution for model 5.

WAIC test

Computed from 12000 by 748 log-likelihood matrix

|           | Estimate | SE   |
|-----------|----------|------|
| elpd_waic | -866.1   | 18.5 |
| p_waic    | 5.7      | 0.3  |
| waic      | 1732.2   | 37.0 |

## Model 6

Equation:

$$\text{Familiarity} \sim \text{Christianity} + \text{Islam} + \text{Buddhism}$$

Where

- *Familiarity* is the respondent's self-perceived familiarity with AI (continuous variable);
- *Christianity* is whether the respondent's religion is Christianity (binary variable);
- *Islam* is whether the respondent's religion is Islam (binary variable);
- *Buddhism* is whether the respondent's religion is Buddhism (binary variable);



**Figure S6.0:** Visualization of model 6.

**Table S6.1:** Posterior estimate of model 6

|                            | Mean  | SD   | n_eff | Rhat |
|----------------------------|-------|------|-------|------|
| a_Familiarity              | 2.83  | 0.04 | 9795  | 1    |
| b_Christianity_Familiarity | 0.04  | 0.08 | 11355 | 1    |
| b_Buddhism_Familiarity     | -0.07 | 0.07 | 10991 | 1    |
| b_Islam_Familiarity        | 0.17  | 0.09 | 10863 | 1    |

Monte Carlo SE of elpd\_loo is 0.0.  
All Pareto k estimates are good ( $k < 0.5$ ).

Posterior Diagnostics

Trace plot diagnostic



Figure S6.1: Trace plot diagnostic for model 6.

Gelman diagnostic



Figure S6.2: Gelman diagnostic for model 6.

ACF diagnostic



Figure S6.3: ACF diagnostic for model 6.

Posterior results  
Interval distribution



**Figure S6.4:** Model 6's posterior interval distribution for all explanatory variables.

Density distribution



Figure S6.5: Model 6’s posterior density distribution for all explanatory variables.



## Density distribution with HPDI



**Figure S6.6:** Model 6's density distribution with HDPI for all the explanatory variables.

## Model Fit Diagnostic

### Loo test

Computed from 12000 by 748 log-likelihood matrix

|                       | Estimate | SE   |
|-----------------------|----------|------|
| <code>elpd_loo</code> | -874.9   | 18.1 |
| <code>p_loo</code>    | 4.6      | 0.3  |
| <code>looic</code>    | 1749.8   | 36.2 |

-----  
Monte Carlo SE of `elpd_loo` is 0.0.

All Pareto k estimates are good ( $k < 0.5$ ).  
see `help('pareto-k-diagnostic')` for details.



**Figure S6.7:** PSIS diagnostic plot for model 6.

Marginal predictive distribution



**Figure S6.8:** Marginal predictive distribution for model 6.

WAIC test

Computed from 12000 by 748 log-likelihood matrix

|           | Estimate | SE   |
|-----------|----------|------|
| elpd_waic | -874.9   | 18.1 |
| p_waic    | 4.6      | 0.3  |
| waic      | 1749.8   | 36.2 |

## Model 7

Equation:

$$\text{Familiarity} \sim \text{Christianity} + \text{Islam} + \text{Buddhism} + \text{Christianity\_Religiosity} \\ + \text{Islam\_Religiosity} + \text{Buddhism\_Religiosity}$$

Where

- *Familiarity* is the respondent's familiarity with AI (continuous variable);
- *Christianity* is whether the respondent's religion is Christianity (binary variable);
- *Islam* is whether the respondent's religion is Islam (binary variable);
- *Buddhism* is whether the respondent's religion is Buddhism (binary variable);
- *Religiosity* is the level of respondent's religiosity (ordinal/continuous variable);
- *Buddhism\_Religiosity* is interaction between *Buddhism* and *Religiosity* so that  $\text{Buddhism\_Religiosity} = \text{Buddhism} * \text{Religiosity}$  (continuous variable);
- *Christianity\_Religiosity* is interaction between *Christianity* and *Religiosity* so that  $\text{Christianity\_Religiosity} = \text{Christianity} * \text{Religiosity}$  (continuous variable);
- *Islam\_Religiosity* is interaction between *Islam* and *Religiosity* so that  $\text{Islam\_Religiosity} = \text{Islam} * \text{Religiosity}$  (continuous variable).



Figure S7.0. Visualization of model 7.

**Table 1:** Posterior estimate of model 7

|                                        | Mean  | SD   | n_eff | Rhat |
|----------------------------------------|-------|------|-------|------|
| a_Familiarity                          | 2.78  | 0.07 | 9448  | 1    |
| b_Christianity_Familiarity             | 0.03  | 0.21 | 9428  | 1    |
| b_Christianity_Religiosity_Familiarity | -0.03 | 0.33 | 10145 | 1    |
| b_Buddhism_Attitude                    | -0.06 | 0.17 | 10637 | 1    |
| b_Buddhism_Religiosity_Familiarity     | -0.04 | 0.34 | 11888 | 1    |
| b_Islam_Attitude                       | -0.08 | 0.19 | 8769  | 1    |
| b_Islam_Religiosity_Familiarity        | 0.34  | 0.25 | 10316 | 1    |

Monte Carlo SE of elpd\_loo is 0.0.  
 All Pareto k estimates are good ( $k < 0.5$ ).

Posterior Diagnostics

Trace plot diagnostic



**Figure S7.1:** Trace plot diagnostic for model 7.

## Gelman diagnostic



Figure S7.2: Gelman diagnostic for model 7.

## ACF diagnostic



Figure S7.3: ACF diagnostic for model 7.

Posterior results  
Interval distribution



**Figure S7.4:** Model 7's posterior interval distribution for all explanatory variables.

Density distribution



Figure S7.5: Model 4's density distribution for the all the explanatory variables.



## Density distribution with HPDI



**Figure S7.6:** Model 7's density distribution with HDPI for all the explanatory variables.

## Model Fit Diagnostic

### Loo test

Computed from 12000 by 748 log-likelihood matrix

```
Estimate SE
elpd_loo -875.8 18.1
p_loo    7.2 0.5
looic    1751.6 36.3
```

-----  
Monte Carlo SE of elpd\_loo is 0.0.

All Pareto k estimates are good ( $k < 0.5$ ).  
See `help('pareto-k-diagnostic')` for details.



**Figure S7.7:** PSIS diagnostic plot for model 7.

Marginal predictive distribution



**Figure S7.8:** Marginal predictive distribution for model 7.

WAIC test

Computed from 12000 by 748 log-likelihood matrix

|           | Estimate | SE   |
|-----------|----------|------|
| elpd_waic | -875.8   | 18.1 |
| p_waic    | 7.2      | 0.5  |
| waic      | 1751.5   | 36.3 |

## Model 8

Equation:

$$\text{Familiarity} \sim \text{Income} + \text{SchoolYear} + \text{Sex} + \text{Major} + \text{Christianity} + \text{Islam} + \text{Buddhism} \\ + \text{Christianity\_Religiosity} + \text{Islam\_Religiosity} + \text{Buddhism\_Religiosity}$$

Where

- *Familiarity* is respondent's familiarity with AI (continuous variable);
- *Christianity* is whether the respondent's religion is Christianity (binary variable);
- *Islam* is whether the respondent's religion is Islam (binary variable);
- *Buddhism* is whether the respondent's religion is Buddhism (binary variable);
- *Religiosity* is the level of respondent's religiosity (ordinal/continuous variable);
- *Buddhism\_Religiosity* is interaction between *Buddhism* and *Religiosity* so that  $\text{Buddhism\_Religiosity} = \text{Buddhism} * \text{Religiosity}$  (continuous variable);
- *Christianity\_Religiosity* is interaction between *Christianity* and *Religiosity* so that  $\text{Christianity\_Religiosity} = \text{Christianity} * \text{Religiosity}$  (continuous variable);
- *Islam\_Religiosity* is interaction between *Islam* and *Religiosity* so that  $\text{Islam\_Religiosity} = \text{Islam} * \text{Religiosity}$  (continuous variable).



Figure S8.0: Visualization of model 8.

**Table S8.1:** Posterior estimate of model 8

|                                        | Mean  | SD   | n_eff | Rhat |
|----------------------------------------|-------|------|-------|------|
| a_Familiarity                          | 1.95  | 0.17 | 6542  | 1    |
| b_Christianity_Familiarity             | 0.02  | 0.09 | 10522 | 1    |
| b_Christianity_Religiosity_Familiarity | 0.08  | 0.17 | 11234 | 1    |
| b_Buddhism_Familiarity                 | -0.04 | 0.07 | 13526 | 1    |
| b_Buddhism_Religiosity_Familiarity     | -0.01 | 0.19 | 9820  | 1    |
| b_Islam_Familiarity                    | -0.10 | 0.10 | 11532 | 1    |
| b_Islam_Religiosity_Familiarity        | 0.27  | 0.10 | 8622  | 1    |
| b_Income_Familiarity                   | 0.04  | 0.17 | 10523 | 1    |
| b_SchoolYear_Familiarity               | 0.02  | 0.03 | 10025 | 1    |
| b_Sex_Familiarity                      | 0.23  | 0.06 | 10995 | 1    |
| b_Major_Familiarity                    | 0.11  | 0.06 | 12687 | 1    |

Monte Carlo SE of elpd\_loo is 0.0.  
 All Pareto k estimates are good ( $k < 0.5$ ).

Posterior Diagnostics

Trace plot diagnostic



**Figure S8.1:** Trace plot diagnostic for model 8.

## Gelman diagnostic



**Figure S8.2:** Gelman diagnostic for model 8.

## ACF diagnostic



**Figure S8.3:** ACF diagnostic for model 8.

Posterior results  
Interval distribution



**Figure S8.4:** Model 8's density distribution for the all the explanatory variables.

Density distribution



Figure S8.5: Model 8's posterior interval distribution for all explanatory variables.



## Density distribution with HPDI



**Figure S8.6:** Model 8's density distribution with HDPI for all the explanatory variables.

## Model Fit Diagnostic

### Loo test

computed from 12000 by 748 log-likelihood matrix

|          | Estimate | SE   |
|----------|----------|------|
| elpd_loo | -867.6   | 18.6 |
| p_loo    | 10.9     | 0.7  |
| looic    | 1735.3   | 37.1 |

-----  
Monte Carlo SE of elpd\_loo is 0.0.

All Pareto k estimates are good ( $k < 0.5$ ).  
see `help('pareto-k-diagnostic')` for details.



**Figure S8.7:** PSIS diagnostic plot for model 8.

Marginal predictive distribution



**Figure S8.8:** Marginal predictive distribution for model 8.

WAIC test

Computed from 12000 by 748 log-likelihood matrix

|           | Estimate | SE   |
|-----------|----------|------|
| elpd_waic | -867.6   | 18.6 |
| p_waic    | 10.9     | 0.7  |
| waic      | 1735.3   | 37.1 |

## Model 9

Equation:

$$\begin{aligned} \text{Attitude} \sim & \text{Familiarity} + \text{Income} + \text{SchoolYear} + \text{Sex} + \text{Major} + \text{Christianity} + \text{Islam} \\ & + \text{Buddhism} + \text{Christianity\_Religiosity} + \text{Islam\_Religiosity} \\ & + \text{Buddhism\_Religiosity} \end{aligned}$$

Where

- *Attitude* is attitude towards emotional AI (continuous variable);
- *Christianity* is whether the respondent's religion is Christianity (binary variable);
- *Islam* is whether the respondent's religion is Islam (binary variable);
- *Buddhism* is whether the respondent's religion is Buddhism (binary variable);
- *Religiosity* is the level of respondent's religiosity (ordinal/continuous variable);
- *Buddhism\_Religiosity* is interaction between *Buddhism* and *Religiosity* so that  $\text{Buddhism\_Religiosity} = \text{Buddhism} * \text{Religiosity}$  (continuous variable);
- *Christianity\_Religiosity* is interaction between *Christianity* and *Religiosity* so that  $\text{Christianity\_Religiosity} = \text{Christianity} * \text{Religiosity}$  (continuous variable);
- *Islam\_Religiosity* is interaction between *Islam* and *Religiosity* so that  $\text{Islam\_Religiosity} = \text{Islam} * \text{Religiosity}$  (continuous variable).



Figure S9.0: Visualization of model 9.

**Table S9.1:** Posterior estimate of model 9

|                                     | Mean  | SD   | n_eff | Rhat |
|-------------------------------------|-------|------|-------|------|
| a_Attitude                          | 1.69  | 0.19 | 6592  | 1    |
| b_Christianity_Attitude             | -0.15 | 0.09 | 10059 | 1    |
| b_Christianity_Religiosity_Attitude | -0.05 | 0.17 | 11374 | 1    |
| b_Buddhism_Attitude                 | -0.08 | 0.07 | 9220  | 1    |
| b_Buddhism_Religiosity_Attitude     | -0.25 | 0.19 | 12161 | 1    |
| b_Islam_Attitude                    | -0.29 | 0.10 | 9025  | 1    |
| b_Islam_Religiosity_Attitude        | -0.18 | 0.17 | 10528 | 1    |
| b_Income_Attitude                   | 0.15  | 0.06 | 8215  | 1    |
| b_SchoolYear_Attitude               | 0.05  | 0.03 | 11532 | 1    |
| b_Sex_Attitude                      | 0.11  | 0.06 | 10145 | 1    |
| b_Major_Attitude                    | 0.12  | 0.06 | 13052 | 1    |
| b_Familiarity_Attitude              | 0.18  | 0.04 | 10546 | 1    |

Monte Carlo SE of elpd\_loo is 0.0.  
 All Pareto k estimates are good ( $k < 0.5$ ).

## Posterior Diagnostics

### Trace plot diagnostic



**Figure S9.1:** Trace plot diagnostic for model 9.

## Gelman diagnostic



Figure S9.2: Gelman diagnostic for model 9.

## ACF diagnostic



Figure S9.3: ACF diagnostic for model 9.

Posterior results  
Interval distribution



**Figure S9.4:** Model 9's posterior interval distribution for all explanatory variables.



**Figure S9.5:** Model 9's posterior interval distribution for the interaction between the Buddhism and Religiosity variables.



**Figure S9.6:** Model 9's posterior interval distribution for the interaction between the Islam and Religiosity variables.



**Figure S9.7:** Model 9's posterior interval distribution for the interaction between the Buddhism and Religiosity variables.





**Figure S9.8:** Model 9's posterior interval distribution for the three religions as the predictor of the attitude.

### Density distribution



**Figure S9.8:** Model 9's posterior density distribution for all explanatory variables.



**Figure S9.10:** Model 9's posterior density distribution for the interaction between the Christianity and Religiosity variables.



**Figure S9.11:** Model 9's posterior density distribution for the interaction between the Islam and Religiosity variables.



**Figure S9.12:** Model 9's posterior density distribution for the interaction between the Buddhism and Religiosity variables.



**Figure S9.13:** Model 9's posterior density distribution for the three religions as the predictor of the attitude toward the AI managers.

## Density distribution with HPDI



**Figure S9.14:** Model 9's density distribution with HDPI for all the explanatory variables.

## Model Fit Diagnostic

### Loo test

Computed from 12000 by 748 log-likelihood matrix

|                       | Estimate | SE   |
|-----------------------|----------|------|
| e <sub>l</sub> pd_loo | -851.0   | 19.2 |
| p_loo                 | 13.0     | 0.9  |
| looic                 | 1702.0   | 38.3 |

-----  
 Monte Carlo SE of e<sub>l</sub>pd\_loo is 0.0.

All Pareto k estimates are good (k < 0.5).  
 see `help('pareto-k-diagnostic')` for details.



Figure S9.15: PSIS diagnostic plot for model 9.

Marginal predictive distribution



Figure S9.16: Marginal predictive distribution for model 9.

WAIC test

Computed from 12000 by 748 log-likelihood matrix

|           | Estimate | SE   |
|-----------|----------|------|
| elpd_waic | -851.0   | 19.2 |
| p_waic    | 13.0     | 0.9  |
| waic      | 1701.9   | 38.3 |

## Model 10

Equation:

$$\begin{aligned} \text{Attitude} \sim & \alpha[\text{Region}_{\text{variant}}] + \text{Familiarity} + \text{Income} + \text{SchoolYear} + \text{Sex} + \text{Major} \\ & + \text{Christianity} + \text{Islam} + \text{Buddhism} + \text{Christianity\_Religiosity} \\ & + \text{Islam\_Religiosity} + \text{Buddhism\_Religiosity} \end{aligned}$$

Where

- *Region* is the region where the respondent is from (categorical variable);
- *Attitude* is attitude towards emotional AI (continuous variable);
- *Christianity* is whether the respondent's religion is Christianity (binary variable);
- *Islam* is whether the respondent's religion is Islam (binary variable);
- *Buddhism* is whether the respondent's religion is Buddhism (binary variable);
- *Religiosity* is the level of respondent's religiosity (ordinal/continuous variable);
- *Buddhism\_Religiosity* is interaction between *Buddhism* and *Religiosity* so that  $\text{Buddhism\_Religiosity} = \text{Buddhism} * \text{Religiosity}$  (continuous variable);
- *Christianity\_Religiosity* is interaction between *Christianity* and *Religiosity* so that  $\text{Christianity\_Religiosity} = \text{Christianity} * \text{Religiosity}$  (continuous variable);
- *Islam\_Religiosity* is interaction between *Islam* and *Religiosity* so that  $\text{Islam\_Religiosity} = \text{Islam} * \text{Religiosity}$  (continuous variable).



Figure S10.0: Visualization of model 10.



**Table S10.1:** Posterior estimate of model 10

|                                                      | <b>Mean</b> | <b>SD</b> | <b>n_eff</b> | <b>Rhat</b> |
|------------------------------------------------------|-------------|-----------|--------------|-------------|
| a_Attitude                                           | 1.61        | 0.35      | 6744         | 1           |
| b_Christianity_Attitude                              | -0.10       | 0.09      | 9854         | 1           |
| b_Christianity_Religiosity_Attitude                  | -0.05       | 0.17      | 10445        | 1           |
| b_Buddhism_Attitude                                  | -0.05       | 0.07      | 10545        | 1           |
| b_Buddhism_Religiosity_Attitude                      | -0.15       | 0.19      | 10186        | 1           |
| b_Islam_Attitude                                     | -0.16       | 0.10      | 9251         | 1           |
| b_Islam_Religiosity_Attitude                         | -0.24       | 0.18      | 9074         | 1           |
| b_Income_Attitude                                    | 0.12        | 0.06      | 9551         | 1           |
| b_SchoolYear_Attitude                                | 0.06        | 0.03      | 11553        | 1           |
| b_Sex_Attitude                                       | 0.09        | 0.06      | 9601         | 1           |
| b_Major_Attitude                                     | 0.13        | 0.06      | 12210        | 1           |
| b_Familiarity_Attitude                               | 0.21        | 0.04      | 9532         | 1           |
| a_Region[Africa]                                     | 1.70        | 0.26      | 6458         | 1           |
| a_Region[Central Asia]                               | 1.75        | 0.24      | 10214        | 1           |
| a_Region[Eastern Asia]                               | 1.78        | 0.18      | 9138         | 1           |
| a_Region[Europe]                                     | 1.36        | 0.26      | 8058         | 1           |
| a_Region[Northern America]                           | 1.53        | 0.24      | 8558         | 1           |
| a_Region[South-Eastern Asia]                         | 1.58        | 0.19      | 9271         | 1           |
| a_Region[Southern Asia]                              | 1.51        | 0.20      | 8872         | 1           |
| a_Region[Oceania]                                    | 1.70        | 0.26      |              |             |
| <i>Monte Carlo SE of elpd_loo is 0.0.</i>            |             |           |              |             |
| <i>All Pareto k estimates are good (k &lt; 0.5).</i> |             |           |              |             |

# Posterior Diagnostics

## Trace plot diagnostic



Figure S10.1: Trace plot diagnostic for model 10.

# Gelman diagnostic



Figure S10.2: Gelman diagnostic for model 10.

# ACF diagnostic



Figure S10.3: ACF diagnostic for model 10.

Posterior results  
Interval distribution



**Figure S10.4:** Model 10's posterior interval distribution for all explanatory variables.



**Figure S10.5:** Model 10's posterior interval distribution for the Regions variable.



**Figure S10.6:** Model 10's posterior interval distribution for the interaction between the Christianity and Religiosity variables.



**Figure S10.7:** Model 10's posterior interval distribution for the interaction between the Islam and Religiosity variables.



**Figure S10.8:** Model 10's posterior interval distribution for the interaction between the Buddhism and Religiosity variables.



**Figure S10.9:** Model 10's posterior interval distribution for the three religions as the predictor of the attitude.

### Density distribution



**Figure S10.10:** Model 10's posterior density distribution for all explanatory variables.





**Figure S10.11:** Model 10's posterior density distribution for all regions.



**Figure S10.12:** Model 10's posterior density distribution for the interaction between the Christianity and Religiosity variables.



**Figure S10.13:** Model 10's posterior density distribution for the interaction between the Islam and Religiosity variables.



**Figure S10.14:** Model 10's posterior density distribution for the interaction between the Islam and Religiosity variables.



**Figure S10.15:** Model 10's posterior density distribution for the three religions as the predictor of the attitude toward the AI managers.

## Density distribution with HPDI



**Figure S10.16:** Model 10's density distribution with HDPI for all the explanatory variables.

## Model Fit Diagnostic

### Loo test

Computed from 12000 by 748 log-likelihood matrix

```

Estimate  SE
elpd_loo -844.3 19.1
p_loo    18.0  1.2
looic    1688.6 38.2
-----

```

Monte Carlo SE of elpd\_loo is 0.0.

All Pareto k estimates are good ( $k < 0.5$ ).  
see help('pareto-k-diagnostic') for details.



**Figure S10.17:** PSIS diagnostic plot for model 10.



**Figure S10.18:** Marginal predictive distribution for model 10.

## WAIC test

Computed from 12000 by 748 log-likelihood matrix

|           | Estimate | SE   |
|-----------|----------|------|
| elpd_waic | -844.2   | 19.1 |
| p_waic    | 18.0     | 1.2  |
| waic      | 1688.4   | 38.2 |

2 (0.3%) p\_waic estimates greater than 0.4. We recommend trying loo instead.  
warning message:

2 (0.3%) p\_waic estimates greater than 0.4. We recommend trying loo instead.

## MODEL 11

$$\begin{aligned}
 \textit{Attitude} \sim & \text{alpha}[\textit{Nationalities}_{\textit{varint}}] + \textit{Familiarity} + \textit{Income} + \textit{SchoolYear} + \textit{Sex} + \textit{Major} \\
 & + \textit{Christianity} + \textit{Islam} + \textit{Buddhism} + \textit{Christianity\_Religiosity} \\
 & + \textit{Islam\_Religiosity} + \textit{Buddhism\_Religiosity}
 \end{aligned}$$

**Table S11.1.** Posterior distribution of model 11 which estimate the effects of different nationalities.

|                                     | Mean  | SD   | n_eff | Rhat |
|-------------------------------------|-------|------|-------|------|
| a_Attitude                          | 1.63  | 0.22 | 6744  | 1    |
| b_Christianity_Attitude             | 0.05  | 0.12 | 9854  | 1    |
| b_Christianity_Religiosity_Attitude | 0.01  | 0.18 | 10445 | 1    |
| b_Buddhism_Attitude                 | -0.02 | 0.08 | 10545 | 1    |
| b_Buddhism_Religiosity_Attitude     | -0.20 | 0.23 | 10186 | 1    |
| b_Islam_Attitude                    | -0.01 | 0.14 | 9251  | 1    |
| b_Islam_Religiosity_Attitude        | -0.53 | 0.20 | 9074  | 1    |
| b_Income_Attitude                   | 0.02  | 0.07 | 9551  | 1    |
| b_SchoolYear_Attitude               | 0.04  | 0.03 | 11553 | 1    |
| b_Sex_Attitude                      | 0.14  | 0.06 | 9601  | 1    |
| b_Major_Attitude                    | 0.16  | 0.06 | 12210 | 1    |
| b_Familiarity_Attitude              | 0.24  | 0.04 | 9532  | 1    |
| a_Country[Bangladesh]               | 1.45  | 0.28 | 6458  | 1    |
| a_Country[China]                    | 1.73  | 0.21 | 10214 | 1    |
| a_Country[India]                    | 1.38  | 0.28 | 9138  | 1    |
| a_Country[Indonesia]                | 1.47  | 0.24 | 8058  | 1    |
| a_Country[Japan]                    | 1.96  | 0.21 | 8558  | 1    |
| a_Country[Nepal]                    | 1.52  | 0.24 | 9271  | 1    |

|                        |      |      |      |   |
|------------------------|------|------|------|---|
| a_Country[South Korea] | 1.69 | 0.23 | 8872 | 1 |
| a_Country[Sri Lanka]   | 1.68 | 0.25 | 8842 | 1 |
| a_Country[Thailand]    | 1.63 | 0.22 | 7851 | 1 |
| a_Country[Vietnam]     | 1.78 | 0.21 | 7526 | 1 |

*Monte Carlo SE of elpd\_loo is 0.0.*

*All Pareto k estimates are good ( $k < 0.5$ ).*
